# Supplementary material
Source: Springer Nature journal article supplement (https://www.springermedizin.de/resource/supplementary/13229_2013_83_MOESM2_ESM.pdf/9676132)

**A**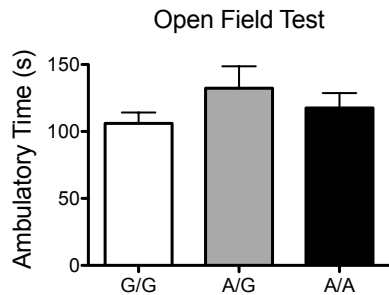**B**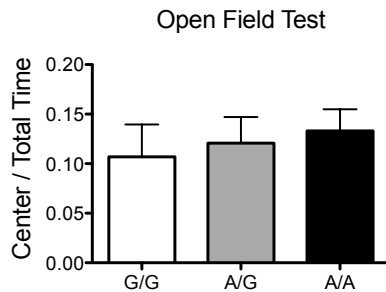**C**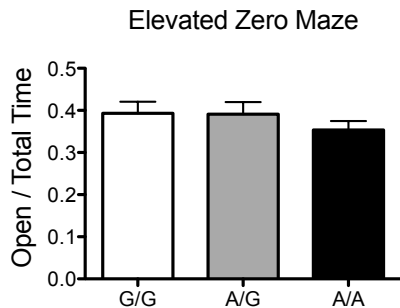**D**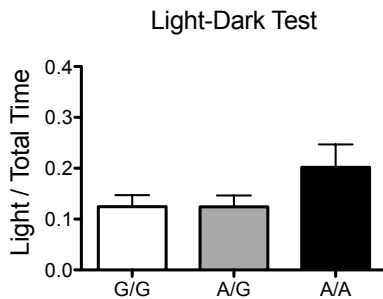

Supplement: MOESM2 [file 9676132]
